# Supplementary material for: Exploration of the origin of the excellent charge-carrier dynamics in Ruddlesden–Popper oxysulfide perovskite Y2Ti2O5S2
Source: Royal Society of Chemistry journal article supplement (doi:10.1039/d3cp02860g), 2023-01-01
Supplement: d3cp02860g1.pdf [file d3cp02860g1.pdf]

# Exploration of the origin of the excellent charge-carrier dynamics in Ruddlesden-Popper oxysulfide perovskite

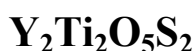

Yisen Yao<sup>1,2</sup>, Qiaoqiao Li<sup>3</sup>, Weibin Chu<sup>5</sup>, Yi-min Ding<sup>2</sup>, Luo Yan<sup>3</sup>, Yang Gao<sup>2,3</sup>, Arup Neogi<sup>2</sup>, Alexander Govorov<sup>2,4\*</sup>, Liujiang Zhou<sup>1,3\*</sup>, Zhiming Wang<sup>1,2\*</sup>

<sup>1</sup>*Institute of Fundamental and Frontier Sciences, University of Electronic Science and Technology of China, Chengdu 610054, China.*

<sup>2</sup>*Yangtze Delta Region Institute (Huzhou), University of Electronic Science and Technology of China, Huzhou 313001, China.*

<sup>3</sup>*School of Physics, University of Electronic Science and Technology of China, Chengdu 610054, China.*

<sup>4</sup>*Department of Physics and Astronomy, Ohio University, Athens, Ohio 45701, United States.*

<sup>5</sup>*Key Laboratory of Computational Physical Sciences (Ministry of Education), Institute of Computational Physical Sciences, Fudan University, Shanghai 200433, China.*

\* Corresponding authors

## Part 1 The orbital overlap features in $\text{Y}_2\text{Ti}_2\text{O}_5\text{S}_2$

The crystal orbital Hamilton populations (COHP) is calculated here to study the overlap between atoms (Figure 1S). The distance between two atoms can also reflect the bonding characteristics to a certain extent (Table 1). The distance between Y and S atoms is 2.82 Å, which is far from than Y–S single bond, indicating an ionic bond. The ELF Figure in text also confirmed this. However, there is still a little overlap between Y– $d_{xy}$  and S– $p_{x,y}$  orbital that contributes to CBM and VBM, respectively (Figure 1S (b)). The distance between Ti and O atom is 1.82 Å, which is smaller than Ti–O single covalent bond, indicating a weak covalent bond between Ti and O atom. From Figure 1S (b) we can find no overlap between Ti– $d_{xy}$  and S– $p_{x,y}$  orbital.

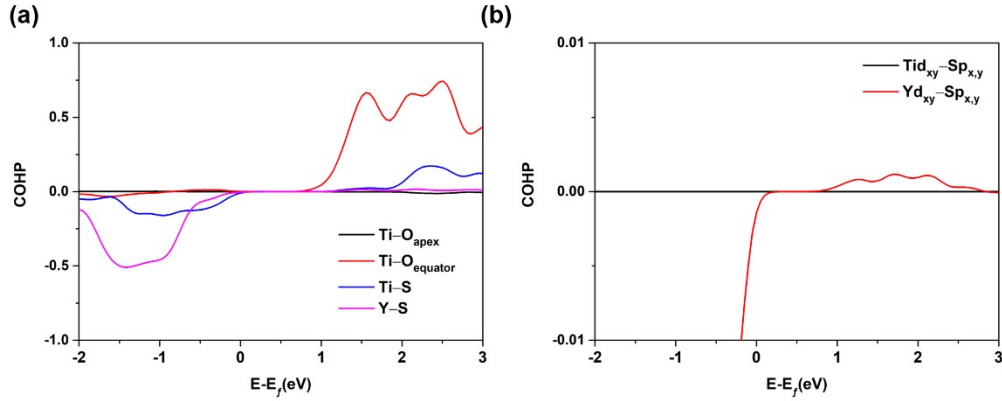

Figure S1. The COHP of selected atom (a) and selected orbital (b) in  $\text{Y}_2\text{Ti}_2\text{O}_5\text{S}_2$ . Ti- $d_{xy}$  orbital and S- $p_{x,y}$  orbital are the major contributors to CBM and VBM individually. We can discover that the optical transition between Ti and S atoms cannot happen because of the no overlap between Ti- $d_{xy}$  orbital and S- $p_{x,y}$  orbital.

Table S1. The table of bond length in our optimized structure and the covalent radii tested by Pekka Pyykkö.<sup>1-4</sup>

| The bond length of $\text{Y}_2\text{Ti}_2\text{O}_5\text{S}_2$ (unit: Å)                  |                      |                   |      |
|-------------------------------------------------------------------------------------------|----------------------|-------------------|------|
|                                                                                           | O <sub>equator</sub> | O <sub>apex</sub> | S    |
| Ti                                                                                        | 1.82                 | 1.96              | 2.92 |
| Y                                                                                         | 2.44                 | -                 | 2.82 |
| Covalent radii of the element involved in $\text{Y}_2\text{Ti}_2\text{O}_5\text{S}_2$ (Å) |                      |                   |      |
| Ti single-bond                                                                            | 1.36                 |                   |      |
| Y single-bond                                                                             | 1.63                 |                   |      |
| O single-bond                                                                             | 0.63                 |                   |      |
| S single-bond                                                                             | 1.03                 |                   |      |

## Part 2 The transition dipole moment (TDM) of $\text{Y}_2\text{Ti}_2\text{O}_5\text{S}_2$ , $\text{CsPbI}_3$ and $\text{Ta}_3\text{N}_5$ .

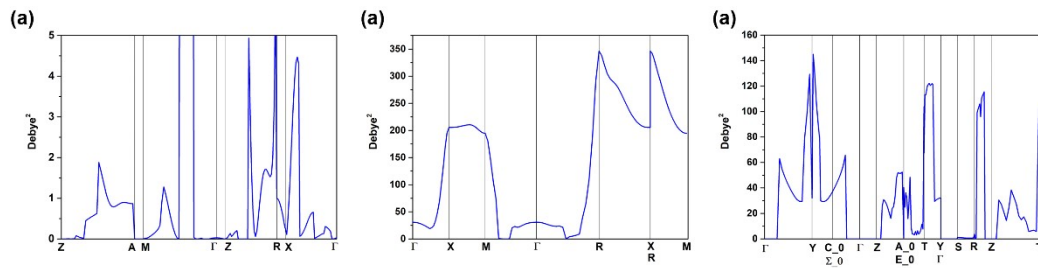

Figure S2. The TDM of  $\text{Y}_2\text{Ti}_2\text{O}_5\text{S}_2$  (a),  $\text{CsPbI}_3$  (b) and  $\text{Ta}_3\text{N}_5$  (c). Although the transition at  $\Gamma$  point is allowed in  $\text{Y}_2\text{Ti}_2\text{O}_5\text{S}_2$ , it is still very weak compared to  $\text{CsPbI}_3$  and  $\text{Ta}_3\text{N}_5$ .

### Part 3 The influence spectra, uACF and pure-dephasing function

Hefei-named packages are used based on hopping probabilities between the two states obtained as<sup>5</sup>:

$$P_{j \rightarrow k}(t, \Delta t) = \frac{2R[c_j^* c_k d_{jk}] \Delta t}{c_j^* c_j} \quad \text{E1}$$

$$d_{jk} = \left\langle \varphi_j \left| \frac{\partial}{\partial t} \right| \varphi_k \right\rangle = \sum_l \frac{\langle \varphi_j | \nabla_{R_l} H | \varphi_k \rangle}{\varepsilon_k - \varepsilon_j} \cdot R_l \quad \text{E2}$$

$c$  are the coefficients of wave functions.  $d_{jk}$  is the NAC between Kohn–Sham states  $j$  and  $k$ .  $H$  is the Kohn-Sham Hamiltonian,  $\varphi_j$ ,  $\varphi_k$ ,  $\varepsilon_k$  and  $\varepsilon_j$  are the wave functions and eigenvalues for electron states  $j$  and  $k$ .  $R_l$  is velocity vector of the nuclei.  $\langle \varphi_j | \nabla_{R_l} H | \varphi_k \rangle$  expresses the time-dependent orbital coupling including the overlap of two states.  $\varepsilon_k - \varepsilon_j$  express the bandgap here. The elastic scattering can be presented by the decay time in pure-dephasing function and the unnormalized autocorrelation functions (uACF). The uACF can be written as:<sup>6, 7</sup>

$$C(t) = \langle \Delta E(t) \Delta E(0) \rangle_T \quad \text{E3}$$

where  $\Delta E(t) = E(t) - \langle E \rangle$  is the fluctuation of the energy gap between the two states forming a coherent superposition from its average value. The pure-dephasing function is given by:

$$D(t) = \exp\left[-\frac{1}{\hbar^2} \int_0^t dt' \int_0^{t'} dt'' C(t'')\right] \quad \text{E4}$$

Fourier transforms (FTs) of the fluctuations for VBM-CBM energy gaps induced by phonon<sup>6, 8, 9</sup>, named influence spectra or spectral density, can reflect the phonon mode that participates in e-ph coupling and is given by:

$$I(\omega) = \frac{1}{2\pi} \left| \int_{-\infty}^{+\infty} dt e^{-i\omega t} C(t) \right|^2 \quad \text{E5}$$

### Part 4 The distribution of band edge and ELF in SrTiO<sub>3</sub>.

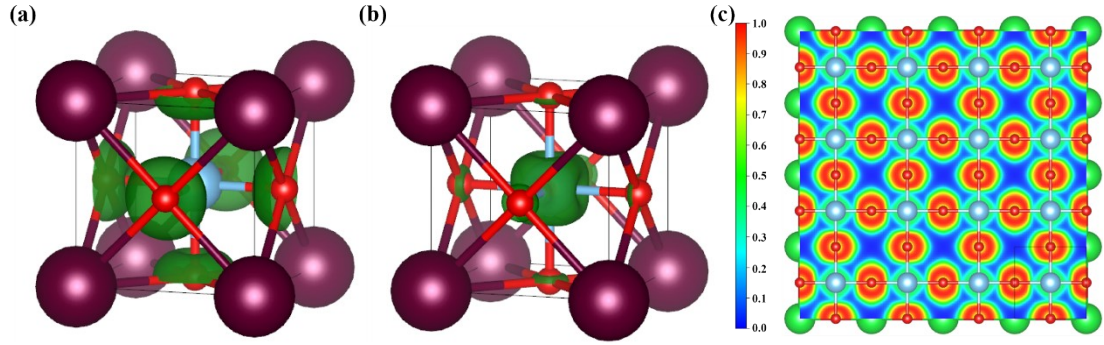

Figure S3 (a)(b) The partial charge density of VBM (a) and CBM (b) in  $\text{SrTiO}_3$  with isosurface value  $0.02 \text{ e}/\text{\AA}^3$ . (c) Electron localization function (ELF) in the (100) plane of  $\text{SrTiO}_3$ . The Ti–O bond is a mixture of ionic and covalent bonding, forming the network distribution of  $0.2 < \text{ELF} < 0.7$  in whole bulk.

#### Part 5 The weak exciton effect in $\text{Y}_2\text{Ti}_2\text{O}_5\text{S}_2$ .

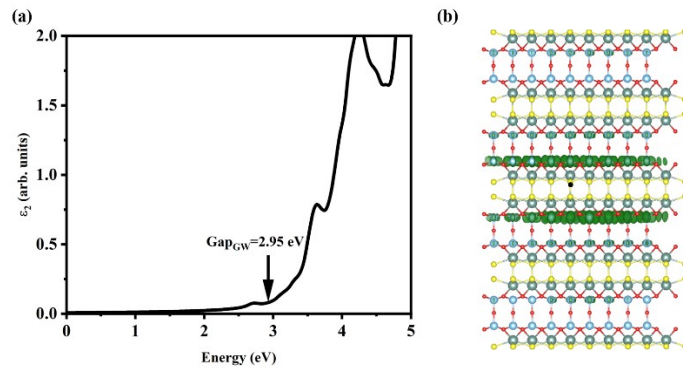

Figure S4 (a) The imaginary parts of the frequency-dependent dielectric function of  $\text{Y}_2\text{Ti}_2\text{O}_5\text{S}_2$ . The optical calculations with e-h interaction are presented, based on BSE level. (b) side view of exciton wave functions of  $\text{Y}_2\text{Ti}_2\text{O}_5\text{S}_2$ . A  $5 \times 5 \times 1$  supercell was adopted. The isovalue value is  $8 \times 10^{-9} \text{ e}/\text{\AA}^3$ . The hole position is marked by a black spot in the rock-salt layer. The electron mainly distributes in the perovskite layer, which finely explains its extremely small density distribution of excitons.

#### Part 6 The Robustness of electron-hole separated transport.

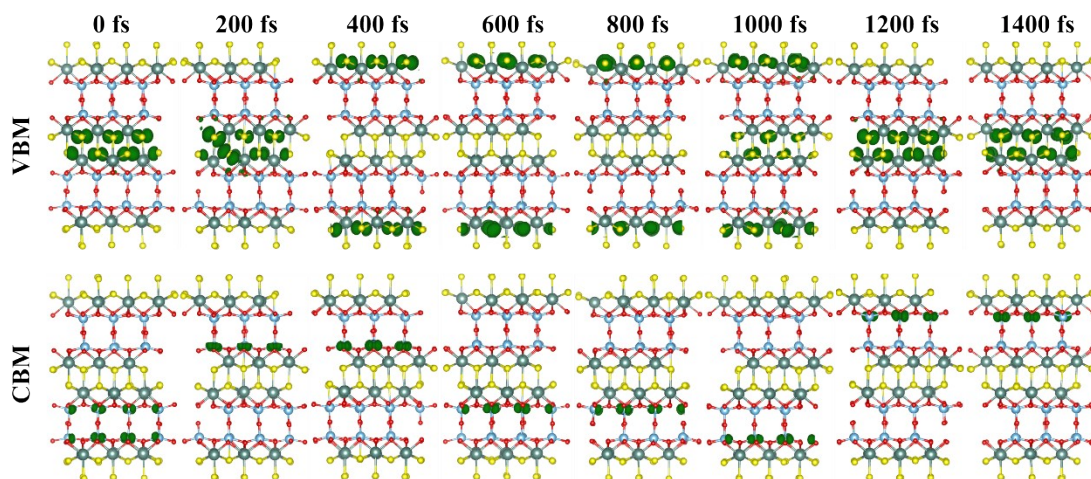

Figure S5 The VBM and CBM's partial charge density of snapshots at room temperature in  $\text{Y}_2\text{Ti}_2\text{O}_5\text{S}_2$ . We can find the robustness of electron-hole separated distribution, which is also the main character of electron-hole separated transport.

1. Pyykko, P.; Riedel, S.; Patzschke, M., Triple-bond covalent radii. *Chemistry-a European Journal* **2005**, *11* (12), 3511-3520.
2. Pyykko, P.; Atsumi, M., Molecular Double-Bond Covalent Radii for Elements Li-E112. *Chemistry-a European Journal* **2009**, *15* (46), 12770-12779.
3. Pyykko, P.; Atsumi, M., Molecular Single-Bond Covalent Radii for Elements 1-118. *Chemistry-a European Journal* **2009**, *15* (1), 186-197.
4. Pyykko, P., Refitted tetrahedral covalent radii for solids. *Phys. Rev. B* **2012**, *85* (2).
5. Zheng, Q. J.; Chu, W. B.; Zhao, C. Y.; Zhang, L. L.; Guo, H. L.; Wang, Y. N.; Jiang, X.; Zhao, J., Ab initio nonadiabatic molecular dynamics investigations on the excited carriers in condensed matter systems. *Wiley Interdiscip. Rev.-Comput. Mol. Sci.* **2019**, *9* (6), 27.
6. Li, W.; Liu, J.; Bai, F.-Q.; Zhang, H.-X.; Prezhdo, O. V., Hole Trapping by Iodine Interstitial Defects Decreases Free Carrier Losses in Perovskite Solar Cells: A Time-Domain Ab Initio Study. *ACS Energy Letters* **2017**, *2* (6), 1270-1278.
7. Zhang, Z.; Fang, W. H.; Tokina, M. V.; Long, R.; Prezhdo, O. V., Rapid Decoherence Suppresses Charge Recombination in Multi-Layer 2D Halide Perovskites: Time-Domain Ab Initio Analysis. *Nano Lett* **2018**, *18* (4), 2459-2466.
8. Li, W.; Tang, J.; Casanova, D.; Prezhdo, O. V., Time-Domain ab Initio Analysis Rationalizes the Unusual Temperature Dependence of Charge Carrier Relaxation in Lead Halide Perovskite. *ACS Energy Letters* **2018**, *3* (11), 2713-2720.
9. Long, R.; Fang, W.; Prezhdo, O. V., Moderate Humidity Delays Electron-Hole Recombination in Hybrid Organic-Inorganic Perovskites: Time-Domain Ab Initio Simulations Rationalize Experiments. *J Phys Chem Lett* **2016**, *7* (16), 3215-22.
